# Supplementary figures and images for: Deep Shotgun metagenomic and 16S rRNA analysis revealed the microbial diversity of lactic acid bacteria in traditional fermented foods of eastern Hainan, China
Source: Royal Society of Chemistry journal article supplement (doi:10.1039/d2fo02501a), 2022-01-01

### Supplementary figure legend

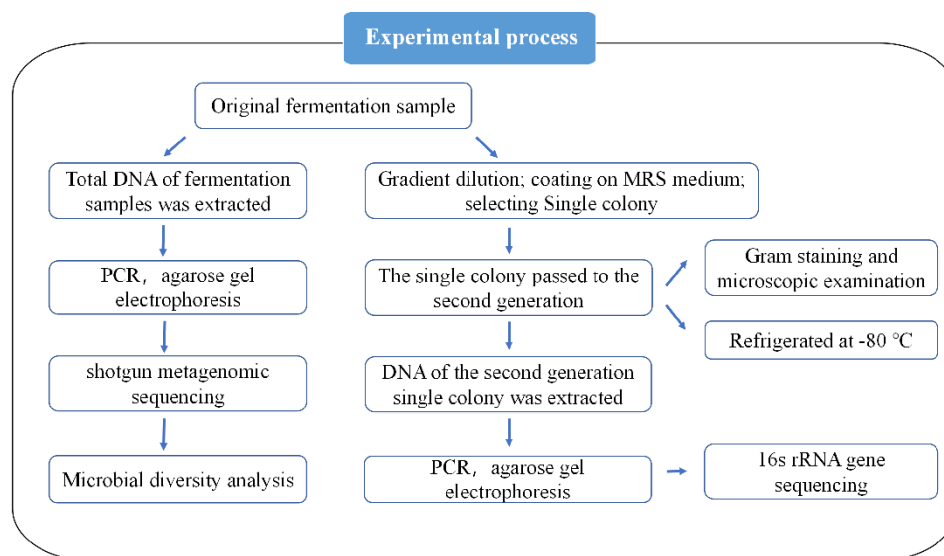

Supplementary Figure S1. Overall experimental process

Supplement: d2fo02501a1.pdf [file d2fo02501a1.pdf]
